# Supplementary material
Source: PubMed Central journal article supplement (PMC5470368)
Supplement: jamaneurol-74-427-s001.pdf [file jamaneurol-74-427-s001.pdf]

## Supplementary Online Content

Xia C, Makaretz SJ, Caso C, et al. Association of in vivo [ $^{18}\text{F}$ ]AV-1451 tau PET imaging results with cortical atrophy and symptoms in typical and atypical Alzheimer disease. *JAMA Neurol*. Published online February 20, 2017. doi:10.1001/jamaneurol.2016.5755

**eTable.** [ $^{18}\text{F}$ ]AV-1451 SUVR Values for Select Regions of Interest

This supplementary material has been provided by the authors to give readers additional information about their work.

**eTable.** [<sup>18</sup>F]AV-1451 SUVR Values for Select Regions of Interest

|                                | <b>Case 1</b><br><b>Amnesic AD*</b> | <b>Case 2</b><br><b>Amnesic AD</b> | <b>Case 3</b><br><b>Amnesic AD</b> | <b>Case 4</b><br><b>PCA</b> | <b>Case 5</b><br><b>IvPPA</b> | <b>Case 6</b><br><b>CBS</b> |
|--------------------------------|-------------------------------------|------------------------------------|------------------------------------|-----------------------------|-------------------------------|-----------------------------|
| Left hippocampus               | 1.7                                 | 1.7                                | 1.4                                | 1.2                         | 1.4                           | 1.2                         |
| Right hippocampus              | 1.7                                 | 1.6                                | 1.4                                | 1.6                         | 1.4                           | 1.2                         |
| Left entorhinal cortex         | 2.0                                 | 2.0                                | 1.7                                | 1.4                         | 1.7                           | 1.4                         |
| Right entorhinal cortex        | 1.8                                 | 2.0                                | 1.7                                | 1.6                         | 1.6                           | 1.4                         |
| Left parahippocampal cortex    | 2.0                                 | 1.9                                | 1.4                                | 1.6                         | 1.5                           | 1.5                         |
| Right parahippocampal cortex   | 2.1                                 | 1.7                                | 1.7                                | 1.7                         | 1.6                           | 1.7                         |
| Left inferior temporal cortex  | 3.1                                 | 2.2                                | 2.2                                | 1.8                         | 2.3                           | 2.0                         |
| Right inferior temporal cortex | 2.8                                 | 2.3                                | 2.2                                | 2.1                         | 2.1                           | 2.1                         |
| Left pericalcarine cortex      | 2.7                                 | 1.2                                | 1.3                                | 1.2                         | 1.4                           | 1.3                         |
| Right pericalcarine cortex     | 2.4                                 | 1.3                                | 1.5                                | 1.8                         | 1.4                           | 1.4                         |
| Left lateral occipital cortex  | 3.1                                 | 1.8                                | 1.4                                | 1.9                         | 1.9                           | 1.7                         |
| Right lateral occipital cortex | 3.0                                 | 2.1                                | 1.8                                | 2.3                         | 2.1                           | 1.7                         |
| Left inferior parietal cortex  | 3.3                                 | 2.6                                | 2.2                                | 1.9                         | 2.7                           | 2.3                         |
| Right inferior parietal cortex | 3.3                                 | 2.9                                | 2.3                                | 2.1                         | 2.4                           | 2.6                         |
| Left paracentral cortex        | 2.0                                 | 1.2                                | 1.1                                | 1.3                         | 1.7                           | 2.5                         |
| Right paracentral cortex       | 1.9                                 | 1.6                                | 1.1                                | 1.5                         | 1.7                           | 2.8                         |

\* Case 1 is likely Braak stage VI.
